# Supplementary material for: Genome-wide Identification of PbrbHLH Family Genes, and Expression Analysis in Response to drought and Cold Stresses in Pear (Pyrus Bretschneideri)
Source: Research Square preprint supplement (doi:10.21203/rs.3.rs-123842/v1), 2020-12-16

# Genome-wide identification of *PbrbHLH* family genes, and expression analysis in response to drought and cold stresses in pear (*Pyrus bretschneideri*)

Huizhen Dong<sup>1,2</sup>, Qiming Chen<sup>1,2</sup>, Yuqin Dai, Wenjie Hu, Shaoling Zhang\* and Xiaosan Huang\*

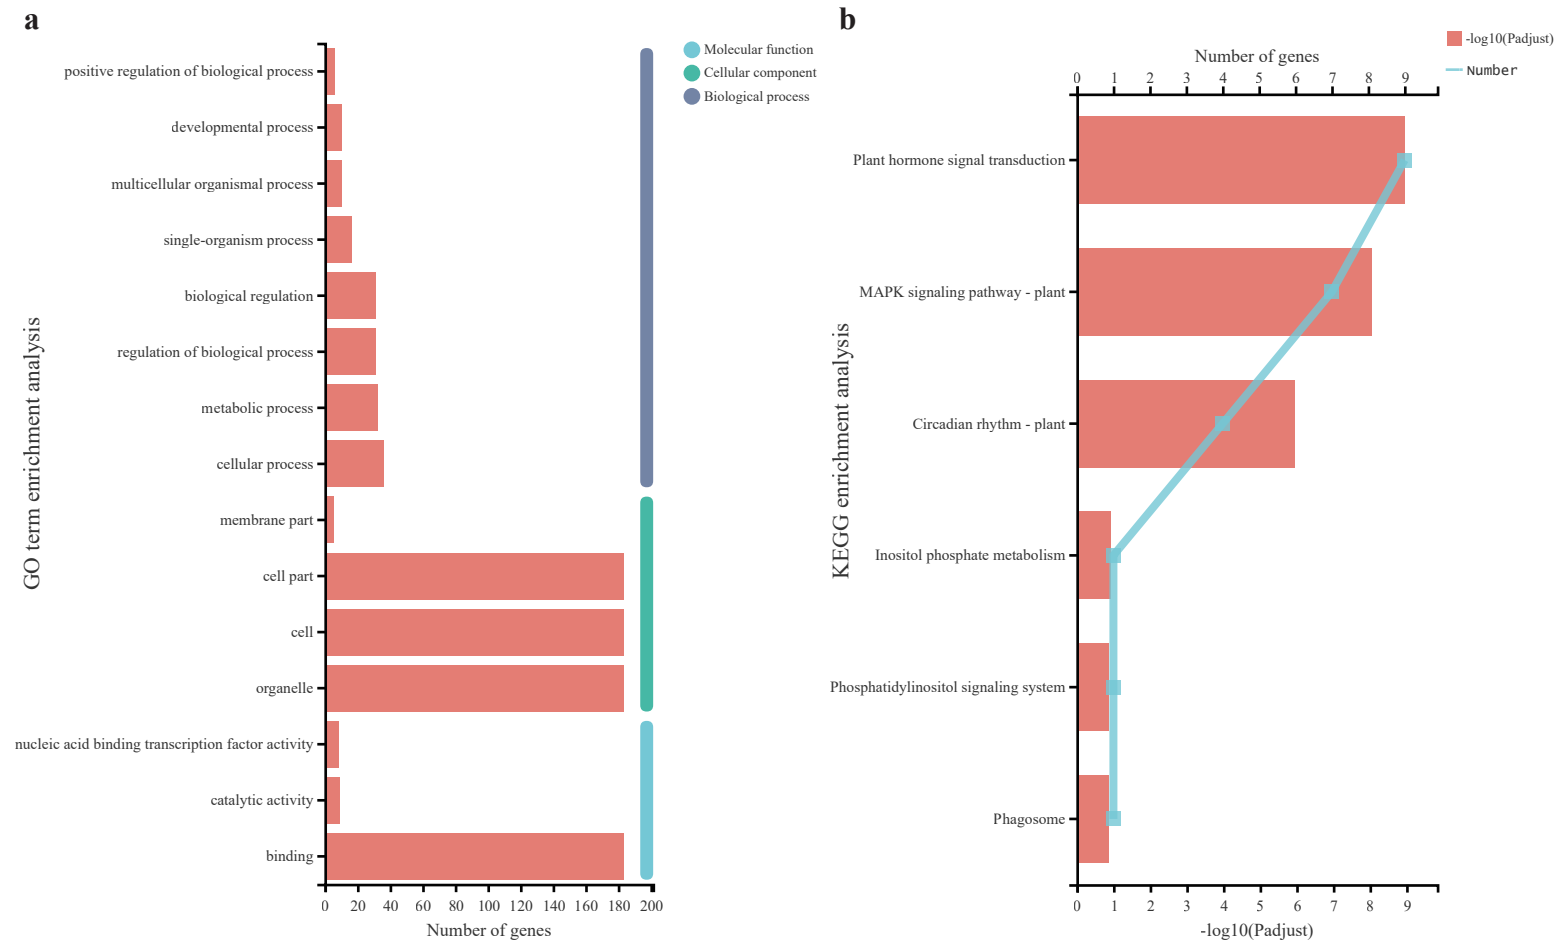

Supplement: Supplementary file 1 [file 2881528f08357a88a03b1950.pdf]
