# Supplementary material for: Genome-wide Identification of PbrbHLH Family Genes, and Expression Analysis in Response to drought and Cold Stresses in Pear (Pyrus Bretschneideri)
Source: Research Square preprint supplement (doi:10.21203/rs.3.rs-123842/v1), 2020-12-16
Supplement: Supplementary file 2 [file 444a5bff6d7a56656b1420f7.xlsx]

## Sheet: Table 3
Numbers of bHLH genes from different origins in Chinese white pear.
Duplication type	Singleton	Dispersed	Proximal	Tandem	WGD/segmental
No. of bHLH genes from different origins (percentage)	3 (1.5)	47 (23.9)	11 (5.6)	20 (10.1)	116 (58.9)
