# Supplementary material for: Genome-wide Identification of PbrbHLH Family Genes, and Expression Analysis in Response to drought and Cold Stresses in Pear (Pyrus Bretschneideri)
Source: Research Square preprint supplement (doi:10.21203/rs.3.rs-123842/v1), 2020-12-16
Supplement: Supplementary file 3 [file 4481ec0095e90fb4f8d65dc5.xlsx]

## Sheet: Table S1
Genome-wide identification of PbrbHLH family genes, and expression analysis in response to drought and cold stresses in pear (Pyrus bretschneideri)
Huizhen Dong1,2, Qiming Chen1,2, Yuqin Dai, Wenjie Hu, Shaoling Zhang* and Xiaosan Huang*
Table S1 Detailed characteristics of PbrbHLHs.
Gene name	Gene ID	Pfam	E-Value	SMART	E-Value	CDD	E-Value
PbrbHLH1	Pbr000207.1	PF00010	1.5e-11	smart00353:HLH	1.36857e-08	cd11446:bHLH_AtILR3_like	4.64675e-44
PbrbHLH2	Pbr000225.1	PF00010	0.00072	Na	Na	cl00081:bHLH_SF	1.53722e-09
PbrbHLH3	Pbr000228.1	PF00010	0.00018	smart00353:HLH	6.79689e-06	cd11393:bHLH_AtbHLH_like	2.74368e-22
PbrbHLH4	Pbr000478.1	PF00010	7.5e-11	Na	Na	cl00081:bHLH_SF	4.36495e-25
PbrbHLH5	Pbr000622.1	PF00010	2.6e-10	smart00353:HLH	1.24266e-11	cd11393:bHLH_AtbHLH_like	1.86464e-19
PbrbHLH6	Pbr000853.1	PF00010	1.4e-11	smart00353:HLH	2.60423e-11	cd11393:bHLH_AtbHLH_like	3.11015e-23
PbrbHLH7	Pbr001568.2	PF00010	2.3e-13	smart00353:HLH	3.67012e-14	cl00081:bHLH_SF	6.18447e-33
PbrbHLH8	Pbr001646.1	PF00010	2.3e-11	smart00353:HLH	7.2333e-05	cl00081:bHLH_SF	1.94201e-27
PbrbHLH9	Pbr001754.1	PF00010	2.3e-10	smart00353:HLH	6.80138e-13	cd11454:bHLH_AtIND_like	4.73344e-39
PbrbHLH10	Pbr002358.2	PF00010	3.5e-16	smart00353:HLH	6.38327e-17	cd11445:bHLH_AtPIF_like	4.3829e-37
PbrbHLH11	Pbr002444.1	PF00010	0.0074	smart00353:HLH	0.0002067	cd11393:bHLH_AtbHLH_like	3.93368e-20
PbrbHLH12	Pbr003532.1	PF00010	5.5e-09	smart00353:HLH	2.59455e-09	cd11454:bHLH_AtIND_like	1.14706e-31
PbrbHLH13	Pbr003533.1	PF00010	2.9e-09	smart00353:HLH	3.19372e-10	cd11454:bHLH_AtIND_like	2.00261e-35
PbrbHLH14	Pbr004256.2	PF00010	1.8e-05	Na	Na	cl00081:bHLH_SF	3.38579e-12
PbrbHLH15	Pbr004361.1	PF00010	2.3e-09	smart00353:HLH	6.25316e-12	cl00081:bHLH_SF	3.71064e-31
PbrbHLH16	Pbr004454.1	PF00010	1.9e-05	Na	Na	cl00081:bHLH_SF	0.000111532
PbrbHLH17	Pbr004663.1	PF00010	2.3e-11	smart00353:HLH	6.61016e-05	cl00081:bHLH_SF	2.53431e-28
PbrbHLH18	Pbr004750.1	PF00010	1.1e-13	smart00353:HLH	9.54901e-12	cl00081:bHLH_SF	4.15972e-26
PbrbHLH19	Pbr004866.1	PF00010	2.2e-11	smart00353:HLH	8.12825e-05	cl00081:bHLH_SF	4.04581e-28
PbrbHLH20	Pbr004947.1	PF00010	1e-08	smart00353:HLH	2.06255e-10	cd11393:bHLH_AtbHLH_like	1.69287e-17
PbrbHLH21	Pbr005087.1	PF00010	6.8e-15	smart00353:HLH	2.71994e-14	cl00081:bHLH_SF	1.6689e-31
PbrbHLH22	Pbr005095.1	PF00010	2e-14	smart00353:HLH	2.36443e-14	cl00081:bHLH_SF	9.4586e-32
PbrbHLH23	Pbr005918.1	PF00010	0.00065	smart00353:HLH	4.18924e-06	cd11393:bHLH_AtbHLH_like	2.86934e-21
PbrbHLH24	Pbr005984.1	PF00010	3.9e-15	smart00353:HLH	3.81959e-17	cd11445:bHLH_AtPIF_like	1.74204e-36
PbrbHLH25	Pbr006313.1	PF00010	1.1e-09	smart00353:HLH	3.58169e-09	cl00081:bHLH_SF	2.33349e-40
PbrbHLH26	Pbr006319.1	PF00010	6.3e-12	smart00353:HLH	7.74905e-09	cd11448:bHLH_AtFAMA_like	1.96495e-40
PbrbHLH27	Pbr006544.1	PF00010	2.9e-11	smart00353:HLH	1.48035e-08	cl00081:bHLH_SF	3.80371e-37
PbrbHLH28	Pbr006687.1	PF00010	2.3e-15	smart00353:HLH	1.90361e-17	cd11445:bHLH_AtPIF_like	3.0519e-36
PbrbHLH29	Pbr007168.1	PF00010	6.8e-14	smart00353:HLH	2.65078e-12	cd11453:bHLH_AtBIM_like	2.58203e-44
PbrbHLH30	Pbr007246.1	PF00010	1.4e-14	smart00353:HLH	1.51358e-14	cd11445:bHLH_AtPIF_like	9.09647e-26
PbrbHLH31	Pbr007344.1	PF00010	5.5e-11	smart00353:HLH	1.34177e-13	cl00081:bHLH_SF	4.43653e-32
PbrbHLH32	Pbr007757.1	PF00010	0.0001	smart00353:HLH	2.59141e-08	cd11393:bHLH_AtbHLH_like	1.81954e-14
PbrbHLH33	Pbr007793.1	PF00010	1.1e-11	smart00353:HLH	1.41749e-09	cd11448:bHLH_AtFAMA_like	2.68693e-42
PbrbHLH34	Pbr008209.1	PF00010	3.4e-12	smart00353:HLH	4.57955e-09	cd11455:bHLH_AtAIG1_like	1.81718e-33
PbrbHLH35	Pbr008210.1	PF00010	3.4e-12	smart00353:HLH	4.57955e-09	cd11455:bHLH_AtAIG1_like	1.81718e-33
PbrbHLH36	Pbr008711.1	PF00010	1.1e-11	smart00353:HLH	5.24298e-07	cd11393:bHLH_AtbHLH_like	2.53656e-12
PbrbHLH37	Pbr008831.1	PF00010	9.7e-08	smart00353:HLH	2.04893e-05	cl00081:bHLH_SF	1.61575e-22
PbrbHLH38	Pbr009042.1	PF00010	1.6e-11	smart00353:HLH	2.59518e-12	cd11449:bHLH_AtAIB_like	8.70392e-42
PbrbHLH39	Pbr009044.1	PF00010	1.9e-11	smart00353:HLH	2.75759e-12	cd11449:bHLH_AtAIB_like	2.57728e-42
PbrbHLH40	Pbr009072.1	PF00010	1.8e-08	Na	Na	cl00081:bHLH_SF	7.18012e-18
PbrbHLH41	Pbr009179.1	PF00010	0.00016	smart00353:HLH	1.21761e-05	cl00081:bHLH_SF	9.72037e-15
PbrbHLH42	Pbr009541.1	PF00010	2.2e-13	smart00353:HLH	2.12663e-11	cd11455:bHLH_AtAIG1_like	6.57553e-36
PbrbHLH43	Pbr009756.1	PF00010	0.0055	smart00353:HLH	3.88833e-05	cd11393:bHLH_AtbHLH_like	2.19548e-19
PbrbHLH44	Pbr010125.1	PF00010	1.2e-10	smart00353:HLH	1.50447e-13	cd11443:bHLH_AtAMS_like	3.19838e-39
PbrbHLH45	Pbr010573.1	PF00010	5.8e-07	smart00353:HLH	2.83601e-11	cd18919:bHLH_AtBPE_like	3.94015e-55
PbrbHLH46	Pbr010581.1	PF00010	8.1e-11	smart00353:HLH	9.64795e-14	cd11443:bHLH_AtAMS_like	3.68991e-38
PbrbHLH47	Pbr010800.1	PF00010	3.2e-12	smart00353:HLH	1.07571e-10	cd11448:bHLH_AtFAMA_like	8.25633e-42
PbrbHLH48	Pbr010922.1	PF00010	7e-12	smart00353:HLH	1.27711e-10	cd11455:bHLH_AtAIG1_like	8.20479e-34
PbrbHLH49	Pbr011113.1	PF00010	0.00038	smart00353:HLH	0.00163981	cl00081:bHLH_SF	4.26368e-36
PbrbHLH50	Pbr011456.1	PF00010	3e-07	smart00353:HLH	3.01064e-07	cl00081:bHLH_SF	4.87066e-26
PbrbHLH51	Pbr011460.1	PF00010	0.00035	Na	Na	cl00081:bHLH_SF	1.20574e-09
PbrbHLH52	Pbr011463.1	PF00010	7.7e-09	smart00353:HLH	5.7221e-05	Na	Na
PbrbHLH53	Pbr011525.1	PF00010	8e-10	smart00353:HLH	1.73734e-12	cd18919:bHLH_AtBPE_like	1.27531e-58
PbrbHLH54	Pbr011696.1	PF00010	1.6e-10	smart00353:HLH	3.28037e-12	cl00081:bHLH_SF	1.01413e-27
PbrbHLH55	Pbr012051.1	PF00010	0.0032	smart00353:HLH	1.21482e-06	cd11393:bHLH_AtbHLH_like	1.09327e-21
PbrbHLH56	Pbr013186.1	PF00010	7.4e-15	smart00353:HLH	1.132e-13	cd11453:bHLH_AtBIM_like	5.35738e-47
PbrbHLH57	Pbr013200.1	PF00010	3.2e-07	smart00353:HLH	2.92529e-11	cd18919:bHLH_AtBPE_like	1.13958e-61
PbrbHLH58	Pbr013246.1	PF00010	6e-14	smart00353:HLH	7.60301e-05	cd11455:bHLH_AtAIG1_like	2.91255e-30
PbrbHLH59	Pbr013314.2	PF00010	7.1e-07	smart00353:HLH	2.68476e-10	cd18919:bHLH_AtBPE_like	1.54516e-52
PbrbHLH60	Pbr013349.1	PF00010	1e-06	smart00353:HLH	6.04112e-10	cl00081:bHLH_SF	1.24685e-22
PbrbHLH61	Pbr013624.1	PF00010	4.7e-13	smart00353:HLH	1.16248e-10	cd11448:bHLH_AtFAMA_like	8.98659e-40
PbrbHLH62	Pbr013706.1	PF00010	4.6e-10	smart00353:HLH	1.79079e-11	cl00081:bHLH_SF	3.25233e-34
PbrbHLH63	Pbr013792.1	PF00010	1.9e-07	smart00353:HLH	1.34965e-10	cd18919:bHLH_AtBPE_like	3.16326e-62
PbrbHLH64	Pbr013869.1	PF00010	4.7e-13	smart00353:HLH	2.02259e-08	cd11448:bHLH_AtFAMA_like	5.70467e-41
PbrbHLH65	Pbr013890.1	PF00010	1.3e-12	smart00353:HLH	2.56811e-09	cd11455:bHLH_AtAIG1_like	7.33597e-34
PbrbHLH66	Pbr014375.1	PF00010	1e-08	smart00353:HLH	1.5643e-10	cd11454:bHLH_AtIND_like	5.82924e-34
PbrbHLH67	Pbr014934.1	PF00010	9.8e-08	smart00353:HLH	5.62477e-12	cd18919:bHLH_AtBPE_like	5.90532e-63
PbrbHLH68	Pbr015480.2	PF00010	0.0068	smart00353:HLH	0.000128013	cd11393:bHLH_AtbHLH_like	2.50512e-21
PbrbHLH69	Pbr015624.1	PF00010	5.1e-12	smart00353:HLH	6.92596e-11	cd11393:bHLH_AtbHLH_like	4.67229e-15
PbrbHLH70	Pbr016145.1	PF00010	5e-11	Na	Na	cl00081:bHLH_SF	1.33312e-22
PbrbHLH71	Pbr016539.1	PF00010	1.8e-07	smart00353:HLH	1.60393e-10	cd18919:bHLH_AtBPE_like	3.83044e-62
PbrbHLH72	Pbr016589.1	PF00010	4e-07	smart00353:HLH	2.85404e-07	cl00081:bHLH_SF	1.66096e-28
PbrbHLH73	Pbr016684.1	PF00010	1.1e-14	smart00353:HLH	2.16883e-11	cd18918:bHLH_AtMYC1_like	1.76242e-35
PbrbHLH74	Pbr016686.1	PF00010	6.5e-12	smart00353:HLH	6.88523e-10	cd18918:bHLH_AtMYC1_like	7.51742e-33
PbrbHLH75	Pbr016723.1	PF00010	6.5e-12	smart00353:HLH	6.88523e-10	cd18918:bHLH_AtMYC1_like	7.51742e-33
PbrbHLH76	Pbr016725.1	PF00010	1.1e-14	smart00353:HLH	2.16883e-11	cd18918:bHLH_AtMYC1_like	1.76242e-35
PbrbHLH77	Pbr017127.1	PF00010	2.7e-12	smart00353:HLH	2.31427e-10	cl00081:bHLH_SF	9.33023e-38
PbrbHLH78	Pbr017379.1	PF00010	4.4e-14	smart00353:HLH	1.18269e-15	cl00081:bHLH_SF	6.66102e-30
PbrbHLH79	Pbr018354.1	PF00010	2.4e-08	smart00353:HLH	3.16862e-08	cl00081:bHLH_SF	4.75548e-39
PbrbHLH80	Pbr018411.1	PF00010	6.5e-12	smart00353:HLH	3.14495e-13	cd11449:bHLH_AtAIB_like	1.05001e-40
PbrbHLH81	Pbr018724.1	PF00010	4.8e-13	smart00353:HLH	1.44198e-10	cd11448:bHLH_AtFAMA_like	1.14621e-39
PbrbHLH82	Pbr019435.1	PF00010	2.3e-10	smart00353:HLH	6.80138e-13	cd11454:bHLH_AtIND_like	4.73344e-39
PbrbHLH83	Pbr019649.1	PF00010	1.8e-08	smart00353:HLH	1.95467e-06	cl00081:bHLH_SF	3.02391e-26
PbrbHLH84	Pbr019660.1	PF00010	2.9e-12	smart00353:HLH	1.56002e-11	cd11393:bHLH_AtbHLH_like	2.00926e-16
PbrbHLH85	Pbr019661.2	PF00010	4.5e-15	smart00353:HLH	5.64835e-17	cd11445:bHLH_AtPIF_like	7.47904e-38
PbrbHLH86	Pbr019740.1	PF00010	1.7e-09	smart00353:HLH	5.42729e-10	cd11454:bHLH_AtIND_like	8.12669e-36
PbrbHLH87	Pbr019789.1	PF00010	1.1e-07	smart00353:HLH	3.32807e-12	cd18919:bHLH_AtBPE_like	3.74741e-61
PbrbHLH88	Pbr020204.1	PF00010	2.1e-10	smart00353:HLH	4.62517e-11	cd11453:bHLH_AtBIM_like	2.25919e-42
PbrbHLH89	Pbr020294.1	PF00010	1e-07	smart00353:HLH	1.44559e-10	cd18919:bHLH_AtBPE_like	3.29272e-54
PbrbHLH90	Pbr021160.1	PF00010	0.00011	smart00353:HLH	1.76216e-06	cd11393:bHLH_AtbHLH_like	2.85083e-23
PbrbHLH91	Pbr021351.1	PF00010	6.7e-08	smart00353:HLH	0.000227244	cl00081:bHLH_SF	9.48081e-14
PbrbHLH92	Pbr021888.1	PF00010	1.5e-10	smart00353:HLH	1.16045e-13	cd11443:bHLH_AtAMS_like	1.11055e-39
PbrbHLH93	Pbr021976.1	PF00010	2.2e-10	smart00353:HLH	9.04796e-11	cd11454:bHLH_AtIND_like	1.5997e-37
PbrbHLH94	Pbr022200.3	PF00010	0.0032	smart00353:HLH	0.00340637	cl00081:bHLH_SF	7.78413e-23
PbrbHLH95	Pbr022391.1	PF00010	5.3e-08	smart00353:HLH	8.4556e-12	cd18919:bHLH_AtBPE_like	3.88758e-66
PbrbHLH96	Pbr022398.1	PF00010	5.2e-08	smart00353:HLH	8.4556e-12	cd18919:bHLH_AtBPE_like	7.49839e-66
PbrbHLH97	Pbr022522.1	PF00010	9.9e-12	smart00353:HLH	7.59787e-13	cd11452:bHLH_AtNAI1_like	2.05416e-38
PbrbHLH98	Pbr022523.1	PF00010	9.9e-12	smart00353:HLH	7.59787e-13	cd11452:bHLH_AtNAI1_like	2.05416e-38
PbrbHLH99	Pbr023051.1	PF00010	3.3e-10	smart00353:HLH	1.26779e-08	cd11446:bHLH_AtILR3_like	5.19375e-41
PbrbHLH100	Pbr023206.1	PF00010	5e-11	smart00353:HLH	2.08245e-12	cd11393:bHLH_AtbHLH_like	4.1718e-21
PbrbHLH101	Pbr023339.1	PF00010	1.5e-10	smart00353:HLH	2.75041e-06	cd11446:bHLH_AtILR3_like	1.06035e-33
PbrbHLH102	Pbr023429.1	PF00010	6.8e-09	smart00353:HLH	7.82102e-08	cl00081:bHLH_SF	7.07201e-27
PbrbHLH103	Pbr023800.1	PF00010	1.9e-09	smart00353:HLH	2.80601e-10	cl00081:bHLH_SF	1.99116e-17
PbrbHLH104	Pbr024260.1	PF00010	6.5e-07	smart00353:HLH	2.90363e-11	cd18919:bHLH_AtBPE_like	5.28249e-54
PbrbHLH105	Pbr024262.1	PF00010	1.5e-11	smart00353:HLH	3.7218e-12	cl00081:bHLH_SF	1.33522e-31
PbrbHLH106	Pbr024263.1	PF00010	1.5e-11	smart00353:HLH	3.7218e-12	cl00081:bHLH_SF	1.33522e-31
PbrbHLH107	Pbr024517.1	PF00010	6.4e-09	smart00353:HLH	4.55958e-11	cd11454:bHLH_AtIND_like	3.09242e-35
PbrbHLH108	Pbr024631.1	PF00010	2.7e-07	smart00353:HLH	2.20469e-11	cd18919:bHLH_AtBPE_like	7.03069e-64
PbrbHLH109	Pbr025153.1	PF00010	1.6e-06	smart00353:HLH	1.34571e-11	cd11454:bHLH_AtIND_like	2.62272e-36
PbrbHLH110	Pbr025166.1	PF00010	1.7e-15	smart00353:HLH	4.81205e-17	cd11445:bHLH_AtPIF_like	2.14094e-38
PbrbHLH111	Pbr025285.1	PF00010	1.9e-08	Na	Na	cl00081:bHLH_SF	7.72358e-20
PbrbHLH112	Pbr025316.1	PF00010	4e-12	smart00353:HLH	6.68867e-13	cd11449:bHLH_AtAIB_like	3.46717e-44
PbrbHLH113	Pbr025320.2	PF00010	2.4e-10	smart00353:HLH	1.61899e-09	cl00081:bHLH_SF	1.88799e-33
PbrbHLH114	Pbr025341.3	PF00010	0.0031	Na	Na	cl00081:bHLH_SF	2.97444e-37
PbrbHLH115	Pbr026078.1	PF00010	3.9e-15	smart00353:HLH	3.81959e-17	cd11445:bHLH_AtPIF_like	1.74204e-36
PbrbHLH116	Pbr026439.1	PF00010	2.6e-10	smart00353:HLH	1.66458e-11	cl00081:bHLH_SF	2.50219e-33
PbrbHLH117	Pbr026441.1	PF00010	0.00017	smart00353:HLH	0.00521799	cl00081:bHLH_SF	2.01836e-13
PbrbHLH118	Pbr026442.1	PF00010	1.4e-08	smart00353:HLH	4.58497e-09	cl00081:bHLH_SF	2.46523e-32
PbrbHLH119	Pbr026823.1	PF00010	4.3e-08	Na	Na	cl00081:bHLH_SF	9.83323e-08
PbrbHLH120	Pbr026824.1	PF00010	2.3e-09	Na	Na	cl00081:bHLH_SF	8.86558e-06
PbrbHLH121	Pbr027099.1	PF00010	1.2e-10	smart00353:HLH	1.50447e-13	cd11443:bHLH_AtAMS_like	3.19838e-39
PbrbHLH122	Pbr027108.1	PF00010	6.5e-07	smart00353:HLH	2.60546e-11	cd18919:bHLH_AtBPE_like	5.16974e-54
PbrbHLH123	Pbr027332.1	PF00010	0.00012	smart00353:HLH	1.7661e-06	cd11393:bHLH_AtbHLH_like	1.65478e-23
PbrbHLH124	Pbr027356.1	PF00010	7.7e-12	smart00353:HLH	1.05679e-08	cd11446:bHLH_AtILR3_like	5.85185e-43
PbrbHLH125	Pbr027397.1	PF00010	3.3e-07	smart00353:HLH	5.49683e-05	cl00081:bHLH_SF	3.75779e-12
PbrbHLH126	Pbr027398.1	PF00010	1.3e-10	smart00353:HLH	2.0448e-11	cl00081:bHLH_SF	2.49608e-18
PbrbHLH127	Pbr027399.1	PF00010	4.7e-12	smart00353:HLH	5.23443e-15	cl00081:bHLH_SF	1.71258e-25
PbrbHLH128	Pbr027424.1	PF00010	6.3e-12	smart00353:HLH	2.09204e-13	cd11449:bHLH_AtAIB_like	1.02618e-43
PbrbHLH129	Pbr027487.1	PF00010	5e-14	smart00353:HLH	7.93946e-05	cd11455:bHLH_AtAIG1_like	2.60898e-30
PbrbHLH130	Pbr027564.1	PF00010	0.0062	smart00353:HLH	0.000123984	cd11393:bHLH_AtbHLH_like	2.24178e-21
PbrbHLH131	Pbr028196.1	PF00010	0.00044	smart00353:HLH	0.000101211	cd11393:bHLH_AtbHLH_like	4.12961e-14
PbrbHLH132	Pbr028256.1	PF00010	2.3e-10	smart00353:HLH	6.42327e-13	cd11454:bHLH_AtIND_like	5.03273e-38
PbrbHLH133	Pbr028681.2	PF00010	1.6e-07	smart00353:HLH	5.44999e-05	cl00081:bHLH_SF	1.64248e-23
PbrbHLH134	Pbr028813.1	PF00010	7.8e-07	smart00353:HLH	6.17542e-10	cl00081:bHLH_SF	3.40643e-51
PbrbHLH135	Pbr029607.1	PF00010	3.2e-16	smart00353:HLH	6.20827e-17	cd11445:bHLH_AtPIF_like	3.34658e-36
PbrbHLH136	Pbr030017.2	PF00010	7.6e-15	smart00353:HLH	1.94837e-13	cd11453:bHLH_AtBIM_like	9.51558e-48
PbrbHLH137	Pbr030032.1	PF00010	2.4e-07	smart00353:HLH	2.11051e-11	cd18919:bHLH_AtBPE_like	2.29565e-63
PbrbHLH138	Pbr030115.1	PF00010	0.00099	smart00353:HLH	6.81648e-05	cl00081:bHLH_SF	1.41616e-11
PbrbHLH139	Pbr030521.1	PF00010	5.4e-14	smart00353:HLH	1.84769e-08	cd18914:bHLH_AtORG2_like	4.10156e-25
PbrbHLH140	Pbr030944.1	PF00010	9.4e-12	smart00353:HLH	7.33657e-09	cd11448:bHLH_AtFAMA_like	9.1016e-46
PbrbHLH141	Pbr031107.2	PF00010	1.7e-10	smart00353:HLH	3.22087e-11	cd11393:bHLH_AtbHLH_like	1.07824e-17
PbrbHLH142	Pbr031549.1	PF00010	3.2e-12	smart00353:HLH	1.08629e-10	cd11448:bHLH_AtFAMA_like	7.12024e-42
PbrbHLH143	Pbr032336.1	PF00010	0.00094	smart00353:HLH	0.000555477	cd11393:bHLH_AtbHLH_like	2.19259e-13
PbrbHLH144	Pbr032962.1	PF00010	3.5e-11	smart00353:HLH	6.4983e-15	cd11445:bHLH_AtPIF_like	2.63358e-33
PbrbHLH145	Pbr034181.1	PF00010	1.1e-09	smart00353:HLH	3.58169e-09	cl00081:bHLH_SF	2.33349e-40
PbrbHLH146	Pbr034262.2	PF00010	5.5e-11	smart00353:HLH	1.34482e-13	cl00081:bHLH_SF	5.50958e-32
PbrbHLH147	Pbr034713.1	PF00010	0.0027	smart00353:HLH	0.000938392	cd18917:bHLH_AtSAC51_like	3.0259e-18
PbrbHLH148	Pbr034838.2	PF00010	3.4e-11	smart00353:HLH	1.81182e-07	cd11446:bHLH_AtILR3_like	5.29152e-34
PbrbHLH149	Pbr035115.1	PF00010	0.0025	Na	Na	cl00081:bHLH_SF	6.1437e-35
PbrbHLH150	Pbr035149.1	PF00010	6.2e-11	smart00353:HLH	5.10574e-12	cl00081:bHLH_SF	1.06782e-32
PbrbHLH151	Pbr035437.1	PF00010	1.9e-08	smart00353:HLH	2.07174e-13	cd11454:bHLH_AtIND_like	3.61181e-38
PbrbHLH152	Pbr035703.1	PF00010	1.8e-15	smart00353:HLH	1.56423e-17	cd11445:bHLH_AtPIF_like	5.83999e-38
PbrbHLH153	Pbr035981.1	PF00010	7.2e-11	smart00353:HLH	3.92813e-13	cl00081:bHLH_SF	3.03715e-29
PbrbHLH154	Pbr037054.1	PF00010	2e-15	smart00353:HLH	5.10587e-17	cd11445:bHLH_AtPIF_like	4.35387e-33
PbrbHLH155	Pbr037113.1	PF00010	1.1e-10	smart00353:HLH	3.50516e-12	cl00081:bHLH_SF	1.95424e-35
PbrbHLH156	Pbr037115.1	PF00010	1.4e-10	smart00353:HLH	1.02789e-11	cl00081:bHLH_SF	8.57227e-33
PbrbHLH157	Pbr037148.1	PF00010	0.0042	Na	Na	cl00081:bHLH_SF	8.52668e-35
PbrbHLH158	Pbr037384.1	PF00010	8.1e-07	smart00353:HLH	1.4e-08	cl00081:bHLH_SF	2.74242e-19
PbrbHLH159	Pbr037501.1	PF00010	9.3e-08	smart00353:HLH	2.04428e-05	cl00081:bHLH_SF	1.75673e-22
PbrbHLH160	Pbr037618.1	PF00010	1.7e-13	smart00353:HLH	9.86178e-14	cl00081:bHLH_SF	2.88587e-31
PbrbHLH161	Pbr037679.1	PF00010	1.9e-12	smart00353:HLH	2.36886e-13	cd11449:bHLH_AtAIB_like	1.02345e-47
PbrbHLH162	Pbr037716.1	PF00010	2.3e-11	smart00353:HLH	6.27496e-05	cl00081:bHLH_SF	3.27155e-28
PbrbHLH163	Pbr038026.1	PF00010	2.2e-13	smart00353:HLH	1.68017e-10	cd11455:bHLH_AtAIG1_like	2.7926e-30
PbrbHLH164	Pbr038274.1	PF00010	2.2e-05	smart00353:HLH	6.47552e-06	cl00081:bHLH_SF	2.44556e-25
PbrbHLH165	Pbr038570.1	PF00010	0.0032	smart00353:HLH	1.21482e-06	cd11393:bHLH_AtbHLH_like	1.09327e-21
PbrbHLH166	Pbr038573.1	PF00010	1.4e-11	smart00353:HLH	1.19085e-11	cl00081:bHLH_SF	5.21514e-36
PbrbHLH167	Pbr038574.1	PF00010	3.7e-11	smart00353:HLH	3.27405e-12	cl00081:bHLH_SF	4.35592e-37
PbrbHLH168	Pbr038717.1	PF00010	1.1e-11	smart00353:HLH	1.64368e-12	cd11393:bHLH_AtbHLH_like	4.54652e-21
PbrbHLH169	Pbr038723.1	PF00010	2.5e-08	smart00353:HLH	3.77902e-11	cd18919:bHLH_AtBPE_like	4.33907e-59
PbrbHLH170	Pbr038923.1	PF00010	1e-07	smart00353:HLH	6.11287e-10	cd18919:bHLH_AtBPE_like	3.56378e-53
PbrbHLH171	Pbr039170.1	PF00010	6.7e-08	smart00353:HLH	2.34202e-11	cd18919:bHLH_AtBPE_like	4.40681e-59
PbrbHLH172	Pbr039557.1	PF00010	0.0005	smart00353:HLH	3.0472e-06	cd18917:bHLH_AtSAC51_like	3.7103e-16
PbrbHLH173	Pbr039686.1	PF00010	1.3e-09	smart00353:HLH	9.85612e-09	cl00081:bHLH_SF	1.06061e-25
PbrbHLH174	Pbr040195.1	PF00010	1.9e-08	smart00353:HLH	1.69048e-13	cd11454:bHLH_AtIND_like	3.75933e-38
PbrbHLH175	Pbr040318.1	PF00010	0.0074	smart00353:HLH	0.0002067	cd11393:bHLH_AtbHLH_like	3.93368e-20
PbrbHLH176	Pbr040436.1	PF00010	8.1e-09	smart00353:HLH	1.69808e-11	cl00081:bHLH_SF	4.85511e-34
PbrbHLH177	Pbr040660.1	PF00010	9.3e-12	smart00353:HLH	9.70452e-09	cd11448:bHLH_AtFAMA_like	4.74804e-41
PbrbHLH178	Pbr040691.1	PF00010	0.0013	smart00353:HLH	0.0002823	cd18917:bHLH_AtSAC51_like	1.24245e-17
PbrbHLH179	Pbr040759.1	PF00010	4.7e-13	smart00353:HLH	1.18075e-11	cd18918:bHLH_AtMYC1_like	3.31386e-33
PbrbHLH180	Pbr040761.1	PF00010	2.5e-14	smart00353:HLH	8.92936e-12	cd18918:bHLH_AtMYC1_like	1.81299e-34
PbrbHLH181	Pbr040909.1	PF00010	1.1e-11	smart00353:HLH	7.79852e-13	cd11452:bHLH_AtNAI1_like	3.23622e-38
PbrbHLH182	Pbr040914.1	PF00010	1.1e-11	smart00353:HLH	7.79852e-13	cd11452:bHLH_AtNAI1_like	3.23622e-38
PbrbHLH183	Pbr040944.1	PF00010	4.9e-07	Na	Na	cd11393:bHLH_AtbHLH_like	5.69496e-06
PbrbHLH184	Pbr041115.1	PF00010	2.2e-08	smart00353:HLH	3.32038e-10	cl00081:bHLH_SF	1.90738e-18
PbrbHLH185	Pbr041171.1	PF00010	4.7e-09	smart00353:HLH	1.90877e-06	cd11446:bHLH_AtILR3_like	8.49342e-31
PbrbHLH186	Pbr041211.1	PF00010	8e-10	smart00353:HLH	2.47436e-12	cd18919:bHLH_AtBPE_like	2.29423e-58
PbrbHLH187	Pbr041312.1	PF00010	6.1e-05	smart00353:HLH	0.00818981	cl00081:bHLH_SF	6.53274e-19
PbrbHLH188	Pbr041336.1	PF00010	5e-13	smart00353:HLH	4.75746e-13	cl00081:bHLH_SF	1.68759e-28
PbrbHLH189	Pbr041410.1	PF00010	0.0031	smart00353:HLH	1.26057e-06	cd11393:bHLH_AtbHLH_like	1.253e-21
PbrbHLH190	Pbr041470.1	PF00010	5e-10	smart00353:HLH	8.16055e-07	cd11393:bHLH_AtbHLH_like	4.02601e-10
PbrbHLH191	Pbr041632.1	PF00010	9.7e-11	smart00353:HLH	3.27623e-12	cd11452:bHLH_AtNAI1_like	1.98381e-33
PbrbHLH192	Pbr041633.1	PF00010	2.4e-09	smart00353:HLH	1.63612e-11	cd11452:bHLH_AtNAI1_like	2.52334e-39
PbrbHLH193	Pbr041944.1	PF00010	4.4e-09	smart00353:HLH	2.59455e-09	cd11454:bHLH_AtIND_like	1.14706e-31
PbrbHLH194	Pbr042040.1	PF00010	2.6e-07	smart00353:HLH	1.12201e-09	cl00081:bHLH_SF	9.65885e-19
PbrbHLH195	Pbr042466.1	PF00010	1.6e-12	smart00353:HLH	6.83511e-14	cd11449:bHLH_AtAIB_like	1.53039e-48
PbrbHLH196	Pbr042554.1	PF00010	1e-11	smart00353:HLH	1.81302e-12	cl00081:bHLH_SF	1.26888e-20
PbrbHLH197	Pbr042561.1	PF00010	2.1e-08	smart00353:HLH	3.50839e-11	cd18919:bHLH_AtBPE_like	2.45799e-59

## Sheet: Table S2
Genome-wide identification of PbrbHLH family genes, and expression analysis in response to drought and cold stresses in pear (Pyrus bretschneideri)
Huizhen Dong1,2, Qiming Chen1,2, Yuqin Dai, Wenjie Hu, Shaoling Zhang* and Xiaosan Huang*
Table S2 Duplication type of PbrbHLH genes in Chines white pear.
Gene name	Gene ID	Duplication type
PbrbHLH1	Pbr000207.1	WGD/segmental
PbrbHLH2	Pbr000225.1	singleton
PbrbHLH3	Pbr000228.1	WGD/segmental
PbrbHLH4	Pbr000478.1	WGD/segmental
PbrbHLH5	Pbr000622.1	WGD/segmental
PbrbHLH6	Pbr000853.1	WGD/segmental
PbrbHLH7	Pbr001568.2	dispersed
PbrbHLH8	Pbr001646.1	dispersed
PbrbHLH9	Pbr001754.1	dispersed
PbrbHLH10	Pbr002358.2	WGD/segmental
PbrbHLH11	Pbr002444.1	WGD/segmental
PbrbHLH12	Pbr003532.1	tandem
PbrbHLH13	Pbr003533.1	tandem
PbrbHLH14	Pbr004256.2	WGD/segmental
PbrbHLH15	Pbr004361.1	WGD/segmental
PbrbHLH16	Pbr004454.1	dispersed
PbrbHLH17	Pbr004663.1	dispersed
PbrbHLH18	Pbr004750.1	dispersed
PbrbHLH19	Pbr004866.1	dispersed
PbrbHLH20	Pbr004947.1	WGD/segmental
PbrbHLH21	Pbr005087.1	WGD/segmental
PbrbHLH22	Pbr005095.1	WGD/segmental
PbrbHLH23	Pbr005918.1	dispersed
PbrbHLH24	Pbr005984.1	WGD/segmental
PbrbHLH25	Pbr006313.1	WGD/segmental
PbrbHLH26	Pbr006319.1	WGD/segmental
PbrbHLH27	Pbr006544.1	WGD/segmental
PbrbHLH28	Pbr006687.1	WGD/segmental
PbrbHLH29	Pbr007168.1	WGD/segmental
PbrbHLH30	Pbr007246.1	WGD/segmental
PbrbHLH31	Pbr007344.1	WGD/segmental
PbrbHLH32	Pbr007757.1	singleton
PbrbHLH33	Pbr007793.1	dispersed
PbrbHLH34	Pbr008209.1	tandem
PbrbHLH35	Pbr008210.1	tandem
PbrbHLH36	Pbr008711.1	dispersed
PbrbHLH37	Pbr008831.1	WGD/segmental
PbrbHLH38	Pbr009042.1	WGD/segmental
PbrbHLH39	Pbr009044.1	proximal
PbrbHLH40	Pbr009072.1	WGD/segmental
PbrbHLH41	Pbr009179.1	WGD/segmental
PbrbHLH42	Pbr009541.1	WGD/segmental
PbrbHLH43	Pbr009756.1	dispersed
PbrbHLH44	Pbr010125.1	WGD/segmental
PbrbHLH45	Pbr010573.1	WGD/segmental
PbrbHLH46	Pbr010581.1	WGD/segmental
PbrbHLH47	Pbr010800.1	WGD/segmental
PbrbHLH48	Pbr010922.1	WGD/segmental
PbrbHLH49	Pbr011113.1	WGD/segmental
PbrbHLH50	Pbr011456.1	dispersed
PbrbHLH51	Pbr011460.1	proximal
PbrbHLH52	Pbr011463.1	WGD/segmental
PbrbHLH53	Pbr011525.1	WGD/segmental
PbrbHLH54	Pbr011696.1	WGD/segmental
PbrbHLH55	Pbr012051.1	dispersed
PbrbHLH56	Pbr013186.1	WGD/segmental
PbrbHLH57	Pbr013200.1	WGD/segmental
PbrbHLH58	Pbr013246.1	WGD/segmental
PbrbHLH59	Pbr013314.2	WGD/segmental
PbrbHLH60	Pbr013349.1	dispersed
PbrbHLH61	Pbr013624.1	WGD/segmental
PbrbHLH62	Pbr013706.1	dispersed
PbrbHLH63	Pbr013792.1	WGD/segmental
PbrbHLH64	Pbr013869.1	dispersed
PbrbHLH65	Pbr013890.1	dispersed
PbrbHLH66	Pbr014375.1	WGD/segmental
PbrbHLH67	Pbr014934.1	dispersed
PbrbHLH68	Pbr015480.2	WGD/segmental
PbrbHLH69	Pbr015624.1	WGD/segmental
PbrbHLH70	Pbr016145.1	WGD/segmental
PbrbHLH71	Pbr016539.1	WGD/segmental
PbrbHLH72	Pbr016589.1	WGD/segmental
PbrbHLH73	Pbr016684.1	WGD/segmental
PbrbHLH74	Pbr016686.1	proximal
PbrbHLH75	Pbr016723.1	WGD/segmental
PbrbHLH76	Pbr016725.1	proximal
PbrbHLH77	Pbr017127.1	WGD/segmental
PbrbHLH78	Pbr017379.1	dispersed
PbrbHLH79	Pbr018354.1	dispersed
PbrbHLH80	Pbr018411.1	WGD/segmental
PbrbHLH81	Pbr018724.1	WGD/segmental
PbrbHLH82	Pbr019435.1	WGD/segmental
PbrbHLH83	Pbr019649.1	WGD/segmental
PbrbHLH84	Pbr019660.1	dispersed
PbrbHLH85	Pbr019661.2	WGD/segmental
PbrbHLH86	Pbr019740.1	WGD/segmental
PbrbHLH87	Pbr019789.1	dispersed
PbrbHLH88	Pbr020204.1	WGD/segmental
PbrbHLH89	Pbr020294.1	WGD/segmental
PbrbHLH90	Pbr021160.1	WGD/segmental
PbrbHLH91	Pbr021351.1	WGD/segmental
PbrbHLH92	Pbr021888.1	dispersed
PbrbHLH93	Pbr021976.1	WGD/segmental
PbrbHLH94	Pbr022200.3	WGD/segmental
PbrbHLH95	Pbr022391.1	proximal
PbrbHLH96	Pbr022398.1	proximal
PbrbHLH97	Pbr022522.1	tandem
PbrbHLH98	Pbr022523.1	tandem
PbrbHLH99	Pbr023051.1	dispersed
PbrbHLH100	Pbr023206.1	WGD/segmental
PbrbHLH101	Pbr023339.1	WGD/segmental
PbrbHLH102	Pbr023429.1	dispersed
PbrbHLH103	Pbr023800.1	WGD/segmental
PbrbHLH104	Pbr024260.1	WGD/segmental
PbrbHLH105	Pbr024262.1	tandem
PbrbHLH106	Pbr024263.1	tandem
PbrbHLH107	Pbr024517.1	dispersed
PbrbHLH108	Pbr024631.1	dispersed
PbrbHLH109	Pbr025153.1	WGD/segmental
PbrbHLH110	Pbr025166.1	WGD/segmental
PbrbHLH111	Pbr025285.1	WGD/segmental
PbrbHLH112	Pbr025316.1	proximal
PbrbHLH113	Pbr025320.2	WGD/segmental
PbrbHLH114	Pbr025341.3	WGD/segmental
PbrbHLH115	Pbr026078.1	WGD/segmental
PbrbHLH116	Pbr026439.1	proximal
PbrbHLH117	Pbr026441.1	tandem
PbrbHLH118	Pbr026442.1	tandem
PbrbHLH119	Pbr026823.1	tandem
PbrbHLH120	Pbr026824.1	tandem
PbrbHLH121	Pbr027099.1	WGD/segmental
PbrbHLH122	Pbr027108.1	WGD/segmental
PbrbHLH123	Pbr027332.1	WGD/segmental
PbrbHLH124	Pbr027356.1	WGD/segmental
PbrbHLH125	Pbr027397.1	tandem
PbrbHLH126	Pbr027398.1	tandem
PbrbHLH127	Pbr027399.1	WGD/segmental
PbrbHLH128	Pbr027424.1	dispersed
PbrbHLH129	Pbr027487.1	WGD/segmental
PbrbHLH130	Pbr027564.1	WGD/segmental
PbrbHLH131	Pbr028196.1	WGD/segmental
PbrbHLH132	Pbr028256.1	WGD/segmental
PbrbHLH133	Pbr028681.2	WGD/segmental
PbrbHLH134	Pbr028813.1	WGD/segmental
PbrbHLH135	Pbr029607.1	WGD/segmental
PbrbHLH136	Pbr030017.2	WGD/segmental
PbrbHLH137	Pbr030032.1	WGD/segmental
PbrbHLH138	Pbr030115.1	WGD/segmental
PbrbHLH139	Pbr030521.1	tandem
PbrbHLH140	Pbr030944.1	dispersed
PbrbHLH141	Pbr031107.2	dispersed
PbrbHLH142	Pbr031549.1	WGD/segmental
PbrbHLH143	Pbr032336.1	WGD/segmental
PbrbHLH144	Pbr032962.1	dispersed
PbrbHLH145	Pbr034181.1	WGD/segmental
PbrbHLH146	Pbr034262.2	WGD/segmental
PbrbHLH147	Pbr034713.1	WGD/segmental
PbrbHLH148	Pbr034838.2	WGD/segmental
PbrbHLH149	Pbr035115.1	WGD/segmental
PbrbHLH150	Pbr035149.1	WGD/segmental
PbrbHLH151	Pbr035437.1	WGD/segmental
PbrbHLH152	Pbr035703.1	WGD/segmental
PbrbHLH153	Pbr035981.1	WGD/segmental
PbrbHLH154	Pbr037054.1	dispersed
PbrbHLH155	Pbr037113.1	WGD/segmental
PbrbHLH156	Pbr037115.1	proximal
PbrbHLH157	Pbr037148.1	WGD/segmental
PbrbHLH158	Pbr037384.1	WGD/segmental
PbrbHLH159	Pbr037501.1	dispersed
PbrbHLH160	Pbr037618.1	dispersed
PbrbHLH161	Pbr037679.1	dispersed
PbrbHLH162	Pbr037716.1	dispersed
PbrbHLH163	Pbr038026.1	dispersed
PbrbHLH164	Pbr038274.1	dispersed
PbrbHLH165	Pbr038570.1	dispersed
PbrbHLH166	Pbr038573.1	tandem
PbrbHLH167	Pbr038574.1	tandem
PbrbHLH168	Pbr038717.1	WGD/segmental
PbrbHLH169	Pbr038723.1	WGD/segmental
PbrbHLH170	Pbr038923.1	WGD/segmental
PbrbHLH171	Pbr039170.1	WGD/segmental
PbrbHLH172	Pbr039557.1	singleton
PbrbHLH173	Pbr039686.1	dispersed
PbrbHLH174	Pbr040195.1	WGD/segmental
PbrbHLH175	Pbr040318.1	WGD/segmental
PbrbHLH176	Pbr040436.1	dispersed
PbrbHLH177	Pbr040660.1	WGD/segmental
PbrbHLH178	Pbr040691.1	WGD/segmental
PbrbHLH179	Pbr040759.1	WGD/segmental
PbrbHLH180	Pbr040761.1	tandem
PbrbHLH181	Pbr040909.1	proximal
PbrbHLH182	Pbr040914.1	proximal
PbrbHLH183	Pbr040944.1	dispersed
PbrbHLH184	Pbr041115.1	dispersed
PbrbHLH185	Pbr041171.1	dispersed
PbrbHLH186	Pbr041211.1	WGD/segmental
PbrbHLH187	Pbr041312.1	WGD/segmental
PbrbHLH188	Pbr041336.1	dispersed
PbrbHLH189	Pbr041410.1	dispersed
PbrbHLH190	Pbr041470.1	WGD/segmental
PbrbHLH191	Pbr041632.1	tandem
PbrbHLH192	Pbr041633.1	tandem
PbrbHLH193	Pbr041944.1	WGD/segmental
PbrbHLH194	Pbr042040.1	WGD/segmental
PbrbHLH195	Pbr042466.1	dispersed
PbrbHLH196	Pbr042554.1	WGD/segmental
PbrbHLH197	Pbr042561.1	WGD/segmental

## Sheet: Table S3
Genome-wide identification of PbrbHLH family genes, and expression analysis in response to drought and cold stresses in pear (Pyrus bretschneideri)
Huizhen Dong1,2, Qiming Chen1,2, Yuqin Dai, Wenjie Hu, Shaoling Zhang* and Xiaosan Huang*
Table S3 Sequence informations of 20 detected motifs in MEME analysis.
MotifID	MotifSeq	Length	NSites	Evalue
MEME-1	AERRRREKJNERLKALQSLVP	21	190	0
MEME-2	NVKKTDKASMLDEAIEYVKELQLQVQELS	29	183	0
MEME-3	RPGLLLKJMSALESLGLDVLHASISTFGG	29	80	0
MEME-4	PKSDYIHVRARRGQATDSHSJ	21	41	0
MEME-5	ARMHGIQTLVCIPTPCGVLELGSLDVIKEDWGLVQLVKSLF	41	18	9.5e-305
MEME-6	STASSKSALAEIEVKIIGSEVLIKIQSPK	29	43	1.8e-269
MEME-7	NILGRAFGSGGFVWLAGDHEFQFYECERVKE	31	9	4.9e-169
MEME-8	VRSEQWSYAIFWQAS	15	24	1.4e-118
MEME-9	STEEEKRESMAAMREMIFRIAAMQPINJDPEAVKPPKRRNVKISKDPQSV	50	7	1.2e-145
MEME-10	LLHLNLPPQPPLFRELLQSLPHGYTLPGSGNGSLFSSGGDEREGSGGGIL	50	6	3.8e-141
MEME-11	KGAPGZESQEGPKKDLRSRGLCLVPVSSTQHVGNENGADFWAPAFGNTY	49	13	1.7e-192
MEME-12	HDQMQQQFPDGTTSATSTPYPQPPDLLNLFSLPRCSPSSLLQNSSITFTN	50	5	9.7e-117
MEME-13	YHHHHHQNHHSSMEIELQNELGFNVDNPYNTTTDHDNNINNSHLVSFEHP	50	5	3.9e-117
MEME-14	YSFLFNTKMYEGSCLYASAIAGKLIEVLDGQYAA	34	6	2.1e-114
MEME-15	RLVDGGDVTDSEWFYFYTVSLTQSFSASH	29	8	1.2e-106
MEME-16	AFGGARRPNAALSPEDVSDTEWFYLTSMSFAFNJGSGLPGR	41	11	3.5e-123
MEME-17	GMEDPFFINQWQYMNSLDELGMLPLAAEFGDNLQHSQFHPTFNFKTPIDN	50	4	4.5e-93
MEME-18	DERKPRKRGRKPANGREEPLNHVE	24	8	9.5e-88
MEME-19	WSNDGTEEQVAKLMEEDVGAAMQFLQSKALCJMPISLASAI	41	7	7.8e-92
MEME-20	LDITIIAQMEAEFSLSVKDLVKNLRAALL	29	8	8e-88

## Sheet: Table S4
Genome-wide identification of PbrbHLH family genes, and expression analysis in response to drought and cold stresses in pear (Pyrus bretschneideri)
Huizhen Dong1,2, Qiming Chen1,2, Yuqin Dai, Wenjie Hu, Shaoling Zhang* and Xiaosan Huang*
Table S4 The primers of PbrbHLHs for qRT-PCR and vector construction.
Primer name	Forward primer sequence (5'-3')	Reverse primer sequence (5'-3')	PCR product length (bp)
Primers for qRT-PCR
PbrbHLH7	GGGAGGGTTTTGAAGACGGT	GCTACTGCCCTTCGTCCATT	73
PbrbHLH8	TTCAACGTGGGAATCGGTGT	CCGGTCGTTCAATCGCTTTC	97
PbrbHLH80	GCTGAAAAGCAAGGTGGACG	TCGTGGTGCTCTGATTGTCC	81
PbrbHLH119	TACGCGCAGAGATGGACAAG	TGCCGTAATTCTTGGTCGCT	86
PbrbHLH128	TGGGTTTAGGAGGAGGGGTT	ACCGCGCTCGAAATCAAGTA	77
PbrbHLH160	GTGGTGAGCTTGACATGCAG	GAGACCCTTCCGGAGAAAGC	99
PbrbHLH161	GACCTAGAAAACGGGGTCGG	GGAACTACTGCTCGTAGGGC	104
PbrbHLH195	ACAACGCGTCCTTGATGGAG	GTAGTCAGAAGTGGAGGCCG	117
PbrTUB-b	TGGGCTTTGCTCCTCTTAC	CCTTCGTGCTCATCTTACC	152
Primers for vector construction
PbrbHLH195-TRV2	aaggttaccgaattctctagaACACTCATGCAGCGCCTC	tgtcttcgggacatgcccgggTTCTTGCGGTACTCTTGT	182
The lowercase letters indicated the homologous arm sequences for the homologous recombination with tobacco rattle virus-based vector 2 (TRV2).
