# Supplementary material for: Genome-wide Identification of PbrbHLH Family Genes, and Expression Analysis in Response to drought and Cold Stresses in Pear (Pyrus Bretschneideri)
Source: Research Square preprint supplement (doi:10.21203/rs.3.rs-123842/v1), 2020-12-16
Supplement: Supplementary file 4 [file 99f0cfe3558714e93a0dcb44.xlsx]

## Sheet: Table 2
The duplicate mode and estimation of absolute date for large-scale duplication events for PbrbHLHs.
Colinearity gene pairs		Duplication type		Method	Ka	Ks	Ka/Ks	MYA	P-Value(Fisher)
Gene1	Gene2	Gene1	Gene2
PbrbHLH6	PbrbHLH14	WGD	WGD	NG	0.13659	0.293517	0.465357	97.8586	0.000549028
PbrbHLH10	PbrbHLH135	WGD	WGD	NG	0.0399581	0.134525	0.297031	44.8506	6.54856e-08
PbrbHLH20	PbrbHLH103	WGD	WGD	NG	0.0804806	0.21054	0.382258	70.194	1.27782e-06
PbrbHLH21	PbrbHLH22	WGD	WGD	NG	NA	NA	NA	NA	NA
PbrbHLH24	PbrbHLH28	WGD	WGD	NG	0.0625697	0.160309	0.390306	53.447	1.33689e-08
PbrbHLH25	PbrbHLH145	WGD	WGD	NG	NA	0.00718155	0	2.39433	NA
PbrbHLH29	PbrbHLH72	WGD	WGD	NG	0.590846	2.37044	0.249256	790.305	9.98947e-18
PbrbHLH29	PbrbHLH88	WGD	WGD	NG	0.0605714	0.220001	0.275323	73.3483	5.02846e-14
PbrbHLH30	PbrbHLH138	WGD	WGD	NG	0.0736152	0.160296	0.459246	53.4427	0.00251509
PbrbHLH38	PbrbHLH112	WGD	proximal	NG	0.0771738	0.247165	0.312236	82.4048	6.76258e-11
PbrbHLH40	PbrbHLH15	WGD	WGD	NG	0.254599	1.73104	0.147079	577.129	1.60027e-33
PbrbHLH40	PbrbHLH111	WGD	WGD	NG	0.0265084	0.203411	0.130319	67.8172	1.38733e-13
PbrbHLH42	PbrbHLH48	WGD	WGD	NG	0.0851184	0.242607	0.350849	80.8852	4.08673e-06
PbrbHLH44	PbrbHLH46	WGD	WGD	NG	0.0286437	0.16141	0.177459	53.8141	2.1838e-15
PbrbHLH49	PbrbHLH114	WGD	WGD	NG	0.06577	0.162302	0.405231	54.1115	2.60374e-08
PbrbHLH53	PbrbHLH186	WGD	WGD	NG	0.00603148	0.0101623	0.593518	3.38811	0.416491
PbrbHLH61	PbrbHLH47	WGD	WGD	NG	0.0867548	0.172625	0.502562	57.5532	0.000637985
PbrbHLH61	PbrbHLH142	WGD	WGD	NG	0.0892335	0.172625	0.51692	57.5532	0.00106968
PbrbHLH68	PbrbHLH130	WGD	WGD	NG	0.0339209	0.111671	0.303758	37.2311	3.36321e-05
PbrbHLH69	PbrbHLH190	WGD	WGD	NG	0.0700521	0.148354	0.472195	49.4612	3.1765e-05
PbrbHLH70	PbrbHLH4	WGD	WGD	NG	0.0590306	0.19952	0.295863	66.52	2.0164e-06
PbrbHLH71	PbrbHLH63	WGD	WGD	NG	0.0149454	0.0397548	0.375939	13.2543	0.00884327
PbrbHLH72	PbrbHLH94	WGD	WGD	NG	0.198959	0.395747	0.502744	131.942	8.95182e-06
PbrbHLH73	PbrbHLH76	WGD	proximal	NG	NA	NA	NA	NA	NA
PbrbHLH74	PbrbHLH75	proximal	WGD	NG	NA	NA	NA	NA	NA
PbrbHLH74	PbrbHLH179	proximal	WGD	NG	0.0525897	0.316875	0.165963	105.646	2.56739e-15
PbrbHLH75	PbrbHLH179	WGD	WGD	NG	0.0525897	0.316875	0.165963	105.646	2.56739e-15
PbrbHLH81	PbrbHLH47	WGD	WGD	NG	0.0880193	0.181188	0.485791	60.4081	0.000206034
PbrbHLH81	PbrbHLH61	WGD	WGD	NG	0.00331147	0.0139674	0.237084	4.65673	0.0623594
PbrbHLH81	PbrbHLH142	WGD	WGD	NG	0.0905028	0.181188	0.499498	60.4081	0.000351608
PbrbHLH83	PbrbHLH151	WGD	WGD	NG	0.333514	2.81401	0.118519	938.191	4.15131e-23
PbrbHLH86	PbrbHLH93	WGD	WGD	NG	0.0522582	0.105279	0.496379	35.1	0.007392
PbrbHLH90	PbrbHLH123	WGD	WGD	NG	0.0270928	0.131508	0.206016	43.8448	7.78798e-10
PbrbHLH91	PbrbHLH194	WGD	WGD	NG	0.189313	0.368973	0.513082	123.016	0.000170444
PbrbHLH97	PbrbHLH98	tandem	tandem	NG	NA	NA	NA	NA	NA
PbrbHLH100	PbrbHLH5	WGD	WGD	NG	0.0479742	0.168624	0.284504	56.2192	1.40992e-08
PbrbHLH104	PbrbHLH45	WGD	WGD	NG	0.0675785	0.096863	0.69767	32.2941	0.185088
PbrbHLH104	PbrbHLH122	WGD	WGD	NG	0.0048217	NA	NA	NA	NA
PbrbHLH110	PbrbHLH152	WGD	WGD	NG	0.0140659	0.00788924	1.78292	2.63027	0.722276
PbrbHLH115	PbrbHLH24	WGD	WGD	NG	NA	0.00415255	0	1.38446	NA
PbrbHLH115	PbrbHLH28	WGD	WGD	NG	0.0625697	0.160309	0.390306	53.447	1.33689e-08
PbrbHLH121	PbrbHLH46	WGD	WGD	NG	0.0286437	0.16141	0.177459	53.8141	2.1838e-15
PbrbHLH122	PbrbHLH45	WGD	WGD	NG	0.0675218	0.0971623	0.694938	32.3939	0.140337
PbrbHLH129	PbrbHLH58	WGD	WGD	NG	0.0255161	0.223754	0.114037	74.5996	6.26765e-17
PbrbHLH132	PbrbHLH82	WGD	WGD	NG	0.0979375	0.227441	0.430607	75.8288	0.00336831
PbrbHLH133	PbrbHLH37	WGD	WGD	NG	0.0665271	0.171443	0.388041	57.1591	2.78984e-06
PbrbHLH134	PbrbHLH59	WGD	WGD	NG	0.0842432	0.185561	0.453993	61.866	0.00249849
PbrbHLH134	PbrbHLH170	WGD	WGD	NG	0.438195	1.98458	0.2208	661.659	2.5519e-15
PbrbHLH136	PbrbHLH29	WGD	WGD	NG	0.356549	1.49141	0.239068	497.236	6.8432e-23
PbrbHLH136	PbrbHLH72	WGD	WGD	NG	0.516876	1.81153	0.285325	603.964	1.79037e-15
PbrbHLH142	PbrbHLH47	WGD	WGD	NG	0.00211148	0.0132106	0.159832	4.40441	0.0337635
PbrbHLH143	PbrbHLH131	WGD	WGD	NG	0.0702626	0.143225	0.490573	47.7512	0.00872275
PbrbHLH146	PbrbHLH31	WGD	WGD	NG	0.0406948	0.220173	0.184831	73.4057	5.21842e-17
PbrbHLH151	PbrbHLH109	WGD	WGD	NG	0.0465379	0.146512	0.317638	48.8471	0.000183636
PbrbHLH151	PbrbHLH174	WGD	WGD	NG	0.00178431	0.0246594	0.072358	8.22144	0.0100508
PbrbHLH153	PbrbHLH54	WGD	WGD	NG	0.155091	0.212982	0.728188	71.0082	0.0116334
PbrbHLH155	PbrbHLH150	WGD	WGD	NG	0.236219	0.746934	0.316252	249.028	9.36223e-21
PbrbHLH157	PbrbHLH149	WGD	WGD	NG	0.0609232	0.16553	0.36805	55.1877	5.61051e-10
PbrbHLH170	PbrbHLH89	WGD	WGD	NG	0.0597869	0.198296	0.301503	66.1119	4.01779e-06
PbrbHLH171	PbrbHLH53	WGD	WGD	NG	0.323297	1.62469	0.19899	541.672	9.61109e-24
PbrbHLH174	PbrbHLH109	WGD	WGD	NG	0.0446529	0.131629	0.339233	43.8851	0.00056691
PbrbHLH177	PbrbHLH26	WGD	WGD	NG	0.336021	2.62425	0.128045	874.925	4.32404e-31
PbrbHLH178	PbrbHLH147	WGD	WGD	NG	0.0059621	0.00426685	1.39731	1.42257	0.772501
PbrbHLH196	PbrbHLH168	WGD	WGD	NG	0.0563398	0.0956082	0.589277	31.8758	0.0536712
PbrbHLH197	PbrbHLH169	WGD	WGD	NG	0.00813842	0.0219877	0.370134	7.3307	0.0941955
