# Supplementary material for: Genome-wide Identification of PbrbHLH Family Genes, and Expression Analysis in Response to drought and Cold Stresses in Pear (Pyrus Bretschneideri)
Source: Research Square preprint supplement (doi:10.21203/rs.3.rs-123842/v1), 2020-12-16
Supplement: Supplementary file 5 [file 2f39e7ef3c329bdc374d41a6.xlsx]

## Sheet: Table 1
Characteristics of identified PbrbHLH proteins.
Gene name	Best hit in AT	Chr	start	end	ORF length	Extron num	MW (kDa)	PI	GRAVY
PbrbHLH1	AT5G54680.1	Chr5	27094335	27096404	720	5	26.13	6.29	-0.575
PbrbHLH2	AT4G21330.1	Chr5	27016336	27016952	441	3	16.28	4.24	-0.254
PbrbHLH3	AT1G61660.3	Chr5	26993507	27001224	1323	5	47.48	4.74	-0.502
PbrbHLH4	AT2G40200.1	Chr5	25158927	25161863	804	2	28.85	9.06	-0.296
PbrbHLH5	AT1G51140.1	Chr3	18537202	18539580	1254	6	45.25	6.24	-0.758
PbrbHLH6	AT1G35460.1	Chr15	40505769	40508649	657	4	23.32	5.67	-0.565
PbrbHLH7	AT5G57150.3	scaffold1040.0	66902	68814	774	5	29.31	8.72	-0.577
PbrbHLH8	AT5G65640.1	Chr8	6468092	6469857	1089	4	40.74	4.32	-0.569
PbrbHLH9	AT5G01305.1	Chr12	16099618	16100214	600	1	22.23	6.7	-0.57
PbrbHLH10	AT1G06690.1	Chr17	15208210	15222427	2412	15	88.59	9.32	-0.575
PbrbHLH11	AT4G29100.1	Chr17	16366147	16368813	1026	9	37.25	7.55	-0.702
PbrbHLH12	AT2G14760.1	scaffold1151.0	9562	11543	1062	5	38.46	5.25	-0.539
PbrbHLH13	AT4G33880.1	scaffold1151.0	36152	38137	1104	5	40.15	4.94	-0.688
PbrbHLH14	AT1G35460.1	Chr8	5724025	5727879	702	4	24.66	8.63	-0.676
PbrbHLH15	AT4G02590.2	Chr12	2040321	2045714	1014	7	35.47	6.24	-0.44
PbrbHLH16	AT5G43650.1	scaffold1203.0	77475	79190	546	3	21.27	10.1	-0.846
PbrbHLH17	AT5G65640.1	Chr15	20949598	20951150	1077	4	39.71	4.95	-0.481
PbrbHLH18	AT5G41315.1	scaffold1226.0	3	1454	690	3	25.9	5.7	-0.672
PbrbHLH19	AT5G65640.1	Chr15	35299620	35301589	1098	4	41.14	4.39	-0.585
PbrbHLH20	AT2G42280.3	Chr2	9337765	9339806	1278	6	47.26	6.38	-0.893
PbrbHLH21	AT5G41315.3	Chr14	10423756	10458851	2358	9	87.65	5.13	-0.457
PbrbHLH22	AT5G41315.3	Chr14	10657342	10660577	2052	8	76.58	5.91	-0.422
PbrbHLH23	AT1G27660.1	Chr15	3038629	3044314	1371	7	49.35	6.99	-0.467
PbrbHLH24	AT1G09530.5	Chr16	10077360	10081240	2154	7	76.57	6.55	-0.614
PbrbHLH25	AT3G06120.1	scaffold132.0.1	335925	337641	621	3	22.95	9.23	-0.194
PbrbHLH26	AT1G72210.1	scaffold132.0.1	415469	417397	981	3	36.18	6.51	-0.448
PbrbHLH27	AT1G72210.1	Chr4	632585	633725	783	3	29.21	5.83	-0.361
PbrbHLH28	AT1G09530.5	Chr4	2380472	2383676	2145	7	76.42	6.51	-0.679
PbrbHLH29	AT5G08130.5	Chr14	14953088	14955645	1713	9	62.47	9.04	-0.704
PbrbHLH30	AT4G00050.1	Chr14	15502751	15505135	897	6	32.66	9.6	-0.811
PbrbHLH31	AT2G24260.2	Chr2	20591591	20595907	1410	7	48.56	6.66	-0.474
PbrbHLH32	AT3G22100.1	Chr17	16734318	16735664	1338	1	48.69	9.24	-0.584
PbrbHLH33	AT2G46810.3	Chr1	1364775	1367503	1302	4	48.52	6.03	-0.662
PbrbHLH34	AT2G41130.1	scaffold1497.0	3118	4544	726	2	27.16	8.62	-0.54
PbrbHLH35	AT2G41130.1	scaffold1497.0	33505	34931	726	2	27.16	8.62	-0.54
PbrbHLH36	AT1G49770.1	Chr5	9948267	9951160	849	3	30.42	9.21	-0.403
PbrbHLH37	AT3G21330.1	Chr9	9245860	9247209	1353	1	50.11	6.82	-0.71
PbrbHLH38	AT4G16430.1	Chr10	9856487	9857979	1425	2	52.65	7.24	-0.482
PbrbHLH39	AT4G16430.1	Chr10	9876054	9878083	1512	1	55.69	6.16	-0.454
PbrbHLH40	AT4G02590.2	Chr10	10112702	10116115	894	6	31.43	6.41	-0.368
PbrbHLH41	AT5G41315.3	Chr6	7815415	7818898	1878	6	70.05	6.01	-0.466
PbrbHLH42	AT2G40200.1	Chr1	7131102	7132823	831	2	29.84	9.37	-0.358
PbrbHLH43	AT2G43650.1	scaffold162.0	146901	178353	2154	19	80.5	4.75	-0.807
PbrbHLH44	AT3G26744.4	Chr14	12125142	12127506	1605	4	57.59	5.52	-0.497
PbrbHLH45	AT5G50915.1	Chr15	13329386	13332068	1068	7	39.35	7.02	-0.775
PbrbHLH46	AT3G26744.4	Chr15	13269686	13272442	1644	4	59.07	5.68	-0.52
PbrbHLH47	AT5G53210.1	Chr13	217187	219497	1260	3	44.87	5.92	-0.355
PbrbHLH48	AT2G40200.1	Chr7	11517886	11519641	858	2	31.01	8.33	-0.285
PbrbHLH49	AT2G31280.1	Chr10	8959774	8964350	2223	11	81.76	6.18	-0.364
PbrbHLH50	AT3G47640.1	Chr6	1652351	1654266	744	4	27.31	7.55	-0.745
PbrbHLH51	AT3G28857.1	Chr6	1630526	1630925	330	2	12.16	6.96	-0.443
PbrbHLH52	AT3G47710.1	Chr6	1573126	1574101	282	2	10.38	9.4	-0.685
PbrbHLH53	AT5G62610.2	Chr6	1235430	1238083	870	6	30.55	5.08	-0.712
PbrbHLH54	AT3G14270.1	Chr2	17666963	17682155	7410	18	274.01	5.39	-0.488
PbrbHLH55	AT3G19500.1	Chr10	15027760	15030379	783	5	27.99	8.59	-0.544
PbrbHLH56	AT1G69010.1	Chr3	21842280	21845477	1008	7	36.78	5.88	-0.869
PbrbHLH57	AT1G68920.3	Chr3	21774132	21778787	2283	11	83	7.4	-0.5
PbrbHLH58	AT1G68810.1	Chr3	21442039	21445012	1059	2	39.09	6.76	-0.628
PbrbHLH59	AT1G25330.1	Chr3	20976835	20978516	747	6	27.71	7.42	-0.593
PbrbHLH60	AT2G20180.7	Chr3	20788185	20790941	1113	6	40.55	8.21	-0.433
PbrbHLH61	AT5G53210.1	Chr1	9416218	9418685	1203	3	43.2	4.99	-0.386
PbrbHLH62	AT4G17880.1	Chr16	9798223	9800129	1563	2	58.32	6.68	-0.529
PbrbHLH63	AT3G07340.1	scaffold202.0.1	171486	173848	1632	7	58.63	7.43	-0.613
PbrbHLH64	AT1G22490.1	Chr6	19415337	19417849	969	3	35.91	9.29	-0.526
PbrbHLH65	AT2G41130.1	Chr17	10057378	10058791	726	2	27.1	8.01	-0.536
PbrbHLH66	AT1G66470.1	Chr9	6731103	6744452	1836	9	66.09	8.63	-0.445
PbrbHLH67	AT3G07340.1	Chr10	12766002	12768825	1713	8	61.84	7.14	-0.755
PbrbHLH68	AT4G29100.1	Chr15	15967308	15972064	1176	9	42.2	7.3	-0.576
PbrbHLH69	AT5G56960.2	Chr15	14814368	14817543	1761	7	65.78	8.39	-0.418
PbrbHLH70	AT1G68810.1	Chr10	3695569	3699378	810	2	29.05	8.08	-0.275
PbrbHLH71	AT3G07340.1	Chr4	11760522	11763609	1587	8	56.76	8.19	-0.6
PbrbHLH72	AT1G69010.1	Chr17	17757708	17762671	1221	7	43.88	8.35	-0.53
PbrbHLH73	AT2G31210.1	Chr2	10054241	10056179	1542	3	56.71	5.83	-0.586
PbrbHLH74	AT2G31210.1	Chr2	10074575	10076304	1395	3	51.69	6.47	-0.646
PbrbHLH75	AT2G31210.1	Chr2	10457137	10458866	1395	3	51.69	6.47	-0.646
PbrbHLH76	AT2G31210.1	Chr2	10477477	10479415	1542	3	56.71	5.83	-0.586
PbrbHLH77	AT1G72210.1	Chr12	721524	723015	975	3	36.53	5	-0.442
PbrbHLH78	AT4G09820.1	Chr15	25886991	25893792	2013	7	74.31	4.9	-0.561
PbrbHLH79	AT3G07340.2	Chr13	6771090	6772369	543	6	19.93	8.49	-0.388
PbrbHLH80	AT4G17880.1	Chr1	4498172	4499991	1494	1	55.23	5.61	-0.508
PbrbHLH81	AT5G53210.1	Chr1	9180049	9182549	1203	3	43.18	4.99	-0.393
PbrbHLH82	AT5G01305.1	Chr4	3361294	3361890	600	1	22.23	6.7	-0.57
PbrbHLH83	AT3G50330.1	Chr15	7854064	7854920	756	1	27.88	9.35	-0.562
PbrbHLH84	AT1G49770.1	Chr15	7767619	7768847	705	3	25.85	6.73	-0.308
PbrbHLH85	AT4G36930.1	Chr15	7762918	7765404	1056	6	38.16	5.96	-0.572
PbrbHLH86	AT2G14760.1	Chr15	7261485	7263160	1077	4	39.97	5.3	-0.758
PbrbHLH87	AT1G10120.2	Chr15	6913207	6915155	1281	7	45.8	6.29	-0.661
PbrbHLH88	AT5G08130.7	Chr6	4286812	4291392	1773	11	65.08	8.94	-0.788
PbrbHLH89	AT1G73830.1	Chr6	3710462	3711993	795	6	29.47	5.21	-0.644
PbrbHLH90	AT3G20640.1	Chr15	9143054	9146117	1368	7	49.92	6.44	-0.702
PbrbHLH91	AT2G34820.1	Chr10	2735718	2736795	930	2	35.01	4.61	-0.492
PbrbHLH92	AT3G26744.4	Chr17	23941072	23943930	1536	4	55.71	4.83	-0.496
PbrbHLH93	AT2G14760.1	Chr8	12990009	12991896	1086	4	40.29	4.99	-0.785
PbrbHLH94	AT1G69010.1	Chr9	18756829	18761640	1134	7	40.78	6.44	-0.647
PbrbHLH95	AT4G34530.1	Chr10	21887740	21890367	1320	7	48.14	5.75	-0.584
PbrbHLH96	AT4G34530.1	Chr10	21977209	21979827	1320	7	48.19	5.75	-0.599
PbrbHLH97	AT4G37850.1	Chr5	7214750	7216451	1029	4	38.08	7.61	-0.353
PbrbHLH98	AT4G37850.1	Chr5	7248643	7250344	1029	4	38.08	7.61	-0.353
PbrbHLH99	AT4G14410.2	scaffold351.0.1	189513	191335	675	4	24.94	5.45	-0.665
PbrbHLH100	AT1G51140.1	Chr11	23652606	23656188	1305	6	47.29	6.74	-0.775
PbrbHLH101	AT3G19860.1	Chr2	16242907	16244464	975	5	35.96	7.99	-0.951
PbrbHLH102	AT4G17880.1	Chr11	28888209	28890472	1386	2	50.93	6.99	-0.374
PbrbHLH103	AT2G42280.1	Chr7	453441	455564	1308	6	48.48	7.48	-0.905
PbrbHLH104	AT5G50915.1	Chr12	13203431	13205370	1071	7	39.45	8.36	-0.654
PbrbHLH105	AT4G37850.1	Chr15	25516823	25518252	1062	3	39.06	6.42	-0.49
PbrbHLH106	AT4G37850.1	Chr15	25435077	25436506	1062	3	39.06	6.42	-0.49
PbrbHLH107	AT5G37800.1	Chr17	7619610	7621431	792	6	29.3	7.97	-0.852
PbrbHLH108	AT4G34530.1	Chr5	7750598	7753931	1272	7	46.43	6.01	-0.602
PbrbHLH109	AT5G67060.2	Chr2	13406418	13407251	837	1	31.15	10.34	-0.595
PbrbHLH110	AT4G36930.1	Chr2	13319368	13322043	1122	8	40.81	6.09	-0.537
PbrbHLH111	AT4G02590.2	Chr5	19146494	19150070	909	6	31.91	6.05	-0.313
PbrbHLH112	AT4G16430.1	Chr5	18934846	18936967	1512	1	55.88	6.37	-0.442
PbrbHLH113	AT4G16430.1	Chr5	18869375	18870585	1128	2	41.25	7	-0.454
PbrbHLH114	AT2G31280.1	Chr5	18633552	18637955	2229	11	82.45	6.31	-0.373
PbrbHLH115	AT1G09530.5	Chr12	3917496	3921379	2154	7	76.57	6.55	-0.614
PbrbHLH116	AT2G28160.2	Chr3	14840221	14842265	1053	4	38.35	6.73	-0.396
PbrbHLH117	AT1G69550.1	Chr3	14857124	14874269	3528	9	134.38	7.71	-0.307
PbrbHLH118	AT2G28160.2	Chr3	14886366	14888189	1044	4	38.07	6.05	-0.405
PbrbHLH119	AT4G20970.1	Chr17	3759373	3760370	666	3	25.05	7.66	-0.583
PbrbHLH120	AT4G20970.1	Chr17	3775165	3776020	627	3	24.01	9.09	-0.656
PbrbHLH121	AT3G26744.4	Chr14	12762203	12765393	1605	4	57.59	5.52	-0.497
PbrbHLH122	AT5G50915.1	Chr14	12855296	12858003	1071	7	39.5	8.57	-0.669
PbrbHLH123	AT3G20640.1	Chr5	13842159	13845048	1371	7	49.94	6.36	-0.701
PbrbHLH124	AT5G54680.1	Chr5	13525331	13527890	693	5	25.14	9.13	-0.554
PbrbHLH125	AT2G16910.1	Chr5	13127432	13130656	1695	8	64.04	5.43	-0.692
PbrbHLH126	AT2G16910.1	Chr5	13122299	13123691	786	6	29.37	7.86	-0.181
PbrbHLH127	AT2G16910.1	Chr5	13117288	13120346	1818	8	67.88	4.9	-0.707
PbrbHLH128	AT1G01260.2	Chr1	3882499	3884328	1833	1	67.36	6.64	-0.512
PbrbHLH129	AT1G68810.1	Chr13	2460589	2463318	1053	2	38.75	6.83	-0.656
PbrbHLH130	AT4G29100.1	Chr2	19901470	19905690	1140	9	40.95	6.9	-0.604
PbrbHLH131	AT2G31730.2	scaffold467.0	196436	199525	870	9	32.43	7.61	-0.638
PbrbHLH132	AT5G01305.1	Chr12	5216197	5216784	591	1	21.8	8.46	-0.663
PbrbHLH133	AT3G21330.1	Chr17	9031563	9032906	1347	1	49.3	6.9	-0.605
PbrbHLH134	AT1G25330.1	Chr13	1982008	1983683	717	6	26.63	5.98	-0.684
PbrbHLH135	AT2G43010.2	Chr9	13138658	13140883	1674	7	61.03	6.95	-0.725
PbrbHLH136	AT1G69010.1	Chr13	4199817	4203034	1005	7	36.54	6.59	-0.843
PbrbHLH137	AT1G68920.3	Chr13	4107727	4111792	1653	8	58.78	5.06	-0.582
PbrbHLH138	AT4G00050.1	Chr6	4887155	4889553	1131	5	41.25	7.74	-0.666
PbrbHLH139	AT3G56970.1	scaffold526.0	20152	21309	759	3	28.92	8.42	-0.695
PbrbHLH140	AT3G24140.2	Chr4	12461187	12462781	1365	3	50.78	4.9	-0.598
PbrbHLH141	AT1G05805.1	Chr4	11676123	11681214	1086	6	38.44	8.86	-0.638
PbrbHLH142	AT5G53210.1	Chr11	12922232	12924549	1260	3	44.84	5.43	-0.354
PbrbHLH143	AT2G31730.2	Chr7	10672016	10674734	861	9	32.14	9.07	-0.581
PbrbHLH144	AT2G20180.6	Chr5	17244166	17248840	1464	9	53.02	9.9	-0.765
PbrbHLH145	AT3G06120.1	scaffold639.0.1	60715	62445	621	3	22.95	9.23	-0.194
PbrbHLH146	AT2G24260.1	Chr15	11765124	11768866	1413	7	48.48	6.56	-0.485
PbrbHLH147	AT5G50010.1	scaffold655.0	182209	184247	1083	1	39.75	4.43	-0.736
PbrbHLH148	AT3G19860.1	Chr13	14656478	14658132	1059	5	38.54	7.33	-0.966
PbrbHLH149	AT2G27230.2	Chr6	10899693	10903475	2310	11	84.66	4.58	-0.365
PbrbHLH150	AT4G00870.1	Chr6	11224408	11226263	1542	2	57.19	7.2	-0.605
PbrbHLH151	AT5G67060.1	Chr15	23381295	23382023	732	1	26.85	10.62	-0.605
PbrbHLH152	AT4G36930.1	scaffold697.0	138071	140687	1167	8	42.28	5.39	-0.484
PbrbHLH153	AT3G53690.1	Chr2	16659400	16666799	2487	9	92.52	4.9	-0.496
PbrbHLH154	AT5G61270.1	scaffold745.0.1	145406	150762	1320	6	47.07	7.27	-0.482
PbrbHLH155	AT4G17880.1	Chr14	19188604	19190693	1449	2	53.93	6.75	-0.515
PbrbHLH156	AT4G17880.1	Chr14	19223454	19225368	1566	2	58.53	6.46	-0.578
PbrbHLH157	AT2G27230.2	Chr14	19633839	19638140	2385	10	87.47	4.82	-0.343
PbrbHLH158	AT3G53690.1	Chr15	17135114	17139758	1623	7	60.85	7.13	-0.471
PbrbHLH159	AT3G21330.1	scaffold763.0.1	64350	65696	1350	1	49.94	6.93	-0.709
PbrbHLH160	AT5G57150.1	Chr16	15621565	15625703	735	5	27.77	5	-0.444
PbrbHLH161	AT1G32640.1	scaffold773.0	23504	24874	1374	1	50.16	6.44	-0.657
PbrbHLH162	AT5G65640.1	scaffold775.0	130165	131652	1074	4	39.49	4.51	-0.461
PbrbHLH163	AT1G68810.1	Chr15	38735037	38735835	708	2	25.8	9.79	-0.708
PbrbHLH164	AT5G10530.1	Chr11	4864156	4884598	2229	4	82.36	5.41	-0.253
PbrbHLH165	AT3G19500.1	scaffold809.0	153215	155872	783	5	27.77	8.3	-0.491
PbrbHLH166	AT4G00870.1	Chr6	6218911	6220570	1410	2	52.11	6.03	-0.393
PbrbHLH167	AT5G46830.1	Chr6	6266723	6268150	1137	2	41.84	6.79	-0.353
PbrbHLH168	AT2G42280.1	Chr14	20106973	20109719	951	6	34.74	9.18	-0.707
PbrbHLH169	AT3G57800.2	Chr14	20181881	20186582	1110	8	40.67	5.6	-0.443
PbrbHLH170	AT1G73830.2	Chr14	16070706	16072305	798	6	29.51	5.21	-0.549
PbrbHLH171	AT1G59640.1	Chr13	3371476	3373746	891	6	32.07	6.88	-0.747
PbrbHLH172	AT1G29950.2	Chr10	6704729	6706250	837	2	30.51	5.21	-0.485
PbrbHLH173	AT4G38070.1	Chr15	26803608	26804342	636	2	23.13	10.48	-0.321
PbrbHLH174	AT5G67060.2	Chr15	23542843	23543574	735	1	26.97	10.62	-0.584
PbrbHLH175	AT4G29100.1	Chr17	8804002	8806668	1026	9	37.25	7.55	-0.702
PbrbHLH176	AT2G28160.1	Chr3	14083787	14085285	972	4	35.39	4.46	-0.457
PbrbHLH177	AT1G72210.1	Chr15	37042350	37044909	936	3	34.87	7.34	-0.613
PbrbHLH178	AT5G50010.1	Chr15	37570541	37573248	1083	1	39.82	4.48	-0.755
PbrbHLH179	AT2G31220.1	Chr7	3923753	3925356	870	4	32.13	6.95	-0.564
PbrbHLH180	AT2G31210.1	Chr7	3929075	3931367	1545	3	56.99	5.97	-0.643
PbrbHLH181	AT4G37850.1	scaffold911.0	70566	72288	1044	4	38.53	7.87	-0.403
PbrbHLH182	AT4G37850.1	scaffold911.0	148794	150516	1044	4	38.53	7.87	-0.403
PbrbHLH183	AT5G43650.1	scaffold914.0	94761	97214	756	3	29.2	8.99	-0.766
PbrbHLH184	AT1G30670.1	Chr5	20425616	20427088	924	2	34.42	5.16	-0.385
PbrbHLH185	AT3G19860.1	Chr5	10201972	10206005	1029	5	38.34	6.43	-0.934
PbrbHLH186	AT5G62610.2	scaffold927.0	32483	35092	870	6	30.54	5.24	-0.69
PbrbHLH187	AT4G20970.1	scaffold930.0	119533	120307	507	3	18.18	5.28	-0.21
PbrbHLH188	AT5G41315.3	Chr6	13870216	13873451	1986	8	73.87	5.34	-0.472
PbrbHLH189	AT3G19500.1	scaffold939.0	83047	86537	804	5	28.76	8.86	-0.513
PbrbHLH190	AT5G56960.2	Chr2	18541013	18544243	1791	8	67.08	8.89	-0.375
PbrbHLH191	AT4G37850.1	Chr16	18387503	18388918	1056	3	38.73	7.31	-0.474
PbrbHLH192	AT4G37850.1	Chr16	18414150	18415660	1062	3	38.85	6.51	-0.484
PbrbHLH193	AT2G14760.1	Chr10	16254387	16256363	1062	5	38.62	6.31	-0.526
PbrbHLH194	AT2G34820.1	Chr5	23493559	23495765	1134	2	42.55	5.64	-0.085
PbrbHLH195	AT1G32640.1	scaffold984.0	37062	39652	2067	1	75.5	5.8	-0.61
PbrbHLH196	AT2G42280.1	Chr14	4887436	4890120	999	5	36.51	9.64	-0.612
PbrbHLH197	AT3G57800.2	Chr14	4960408	4965046	1050	6	38.32	6.01	-0.581
